# Supplementary material for: Temporal reprogramming of calcium signalling via crosstalk of gonadotrophin receptors that associate as functionally asymmetric heteromers
Source: PubMed Central journal article supplement (PMC5797151; doi:10.1038/s41598-018-20722-5), 2018-02-02
Supplement: 41598_2018_20722_MOESM1_ESM.pdf [file 41598_2018_20722_MOESM1_ESM.pdf]

## **Supplementary Information**

### **Temporal reprogramming of calcium signalling via crosstalk of gonadotrophin receptors that associate as functionally asymmetric heteromers**

Jonas, K.C, Chen, S; Virta, M, Mora, J; Franks S; Huhtaniemi, I; Hanyaloglu A.C

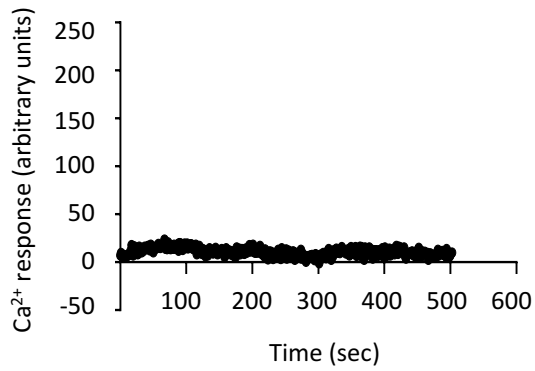

**Figure S1. Activation of FSHR does not induce increases in intracellular Ca<sup>2+</sup>.**

Cells stably expressing HA-FSHR only were treated with Ca<sup>2+</sup> indicator dye Fluo4-AM and imaged live via confocal microscopy. Cells were stimulated with FSH (100 nM). Representative fluorescent trace over time with baseline fluorescence subtracted. Ligand is added at t=0. ~20 cells were analysed per ligand treatment carried out in duplicate, n=3.

(a)

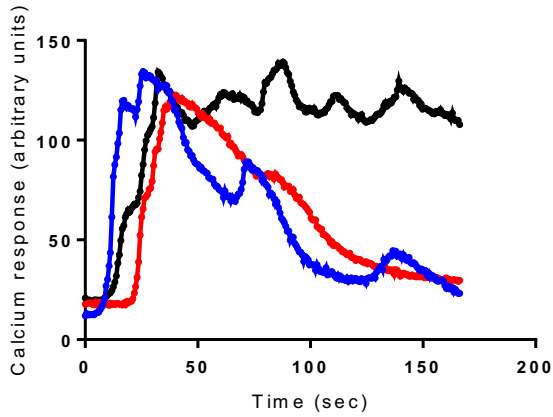

(b)

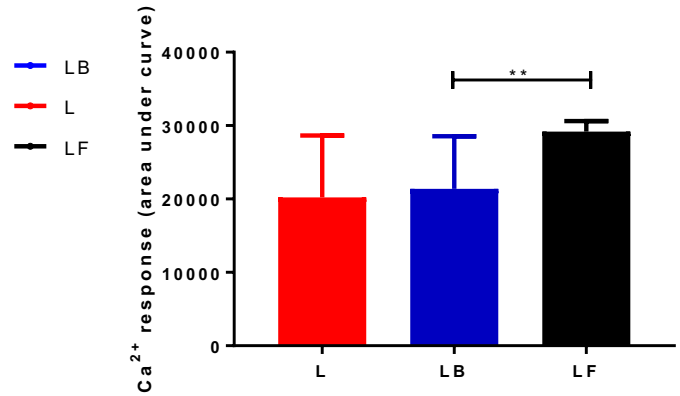

**Figure S2. Coexpression of FSHR, but not the  $\beta$ 2-adrenergic receptor, in LHR expressing cells induces a sustained LH-dependent  $\text{Ca}^{2+}$  response.**

Cells stably expressing LHR only (L), or co-expressing either FSHR (LF) or the  $\beta$ 2-adrenergic receptor (LB) were treated with  $\text{Ca}^{2+}$  indicator dye Fluo4-AM and imaged live via confocal microscopy. All cells were stimulated with LH (100 nM). (a) Representative calcium traces (b) cumulative results, expressed as area under the curve from >20 cells per condition carried out in duplicate,  $n=3$ . Data is presented as Mean  $\pm$  SEM.

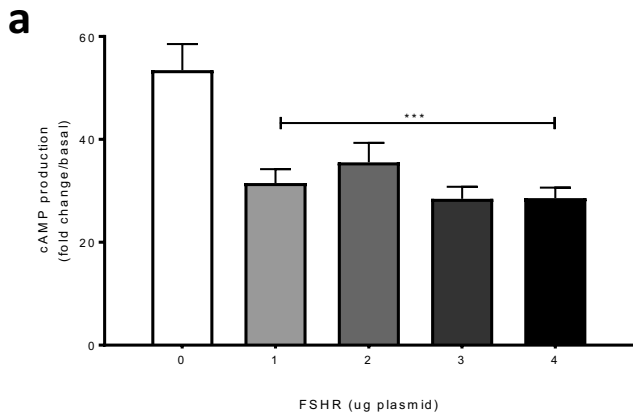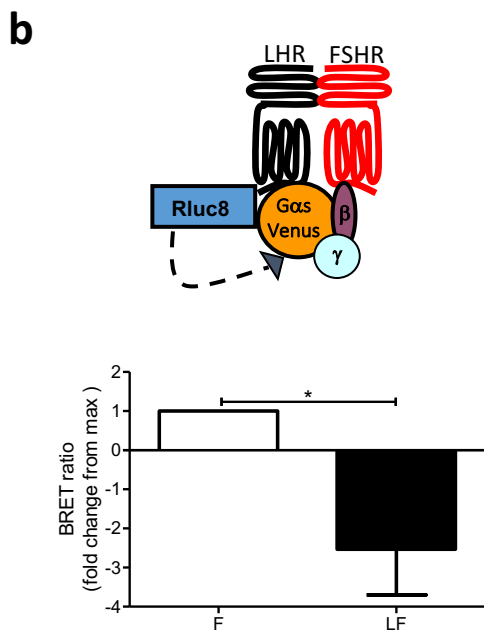

**Figure S3. Crosstalk between LHR and FSHR attenuates LH/LHR-dependent cAMP production and interaction with  $G\alpha_s$ .** **a.** Cells stably expressing LHR were transfected with increasing amounts of FSHR plasmid as indicated in figure. Levels of intracellular cAMP were measured following pre-treatment with IBMX (0.5 mM, 15 min) followed by stimulation with LH (10 nM, 5 min). Cells were lysed in 0.1M HCL/0.1% Triton and cAMP measured via EIA and normalized to protein levels via Bradford. Results are expressed as fold change over basal. Mean + SEM,  $n=3$ . \*\*\* $p<0.001$ , One-way ANOVA with Dunnett's post-hoc test. **b.** Schematic representation and BRET analysis of LH-dependent association of  $G\alpha_s$ -Venus with LHR-Rluc8 expressed in HEK 293 cells or HEK 293 cells stably expressing FSHR. L, LHR-Rluc8 transiently expressed in HEK 293 cells; LF, LHR-Rluc8 in cells stably expressing FSHR. Basal BRET was obtained for 1 min prior to LH (100 nM) addition for 1 min and treatments carried out in triplicate. Data is represented as mean  $\pm$  SEM from  $n=4$ . \* $p<0.05$ .

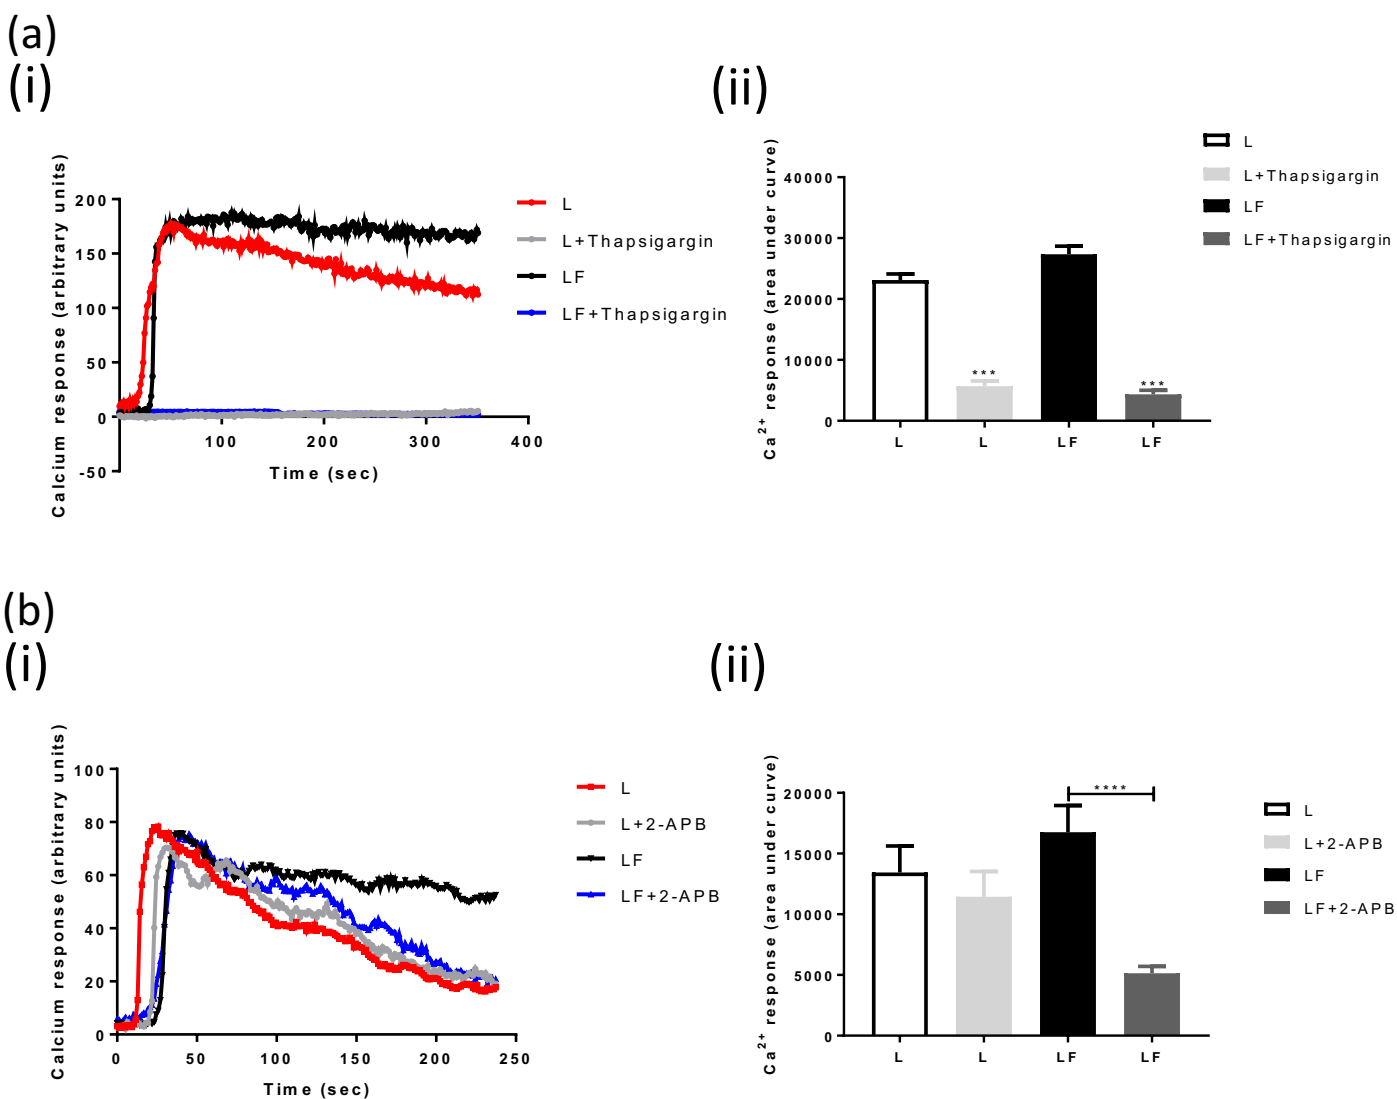

**Figure S4. LH-induced Ca<sup>2+</sup> response is IP<sub>3</sub>-dependent and the sustained response store-operated calcium channel mediated in LHR/FSHR co-expressing cells.**

Cells stably expressing LHR only (L), or co-expressing either FSHR (LF) were treated with Ca<sup>2+</sup> indicator dye Fluo4-AM and imaged live via confocal microscopy. Cells were pre-treated with (a) 100  $\mu$ M 2-APB for 1 min or (b) 1  $\mu$ M thapsigargin for 15 min prior to stimulation with LH (100 nM). (a(i), b(i)) Representative calcium traces (a(ii), b(ii)) cumulative results, expressed as area under the curve from >20 cells per condition carried out in duplicate, n=3. Data is presented as Mean  $\pm$  SEM.

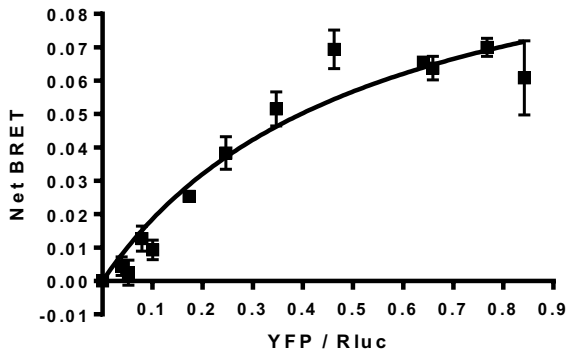

**Figure S5. LHR and FSHR form heteromers.** HEK 293 cells transiently expressing LHR-RLuc8 with and without increasing amounts of FSHR-Venus were assessed for their ability to associate as preformed complexes via BRET. Representative BRET saturation curve of duplicate reads over 5 independent experiments.
